# Supplementary material for: Non-equilibrium fractal growth of MoS2 for electrocatalytic hydrogen evolution
Source: Royal Society of Chemistry journal article supplement (doi:10.1039/c8ce01952e), 2018-12-06
Supplement: c8ce01952e1.pdf [file c8ce01952e1.pdf]

# **Non-equilibrium fractal growth of MoS<sub>2</sub> for electrocatalytic hydrogen evolution**

Taejin Park,<sup>a,b</sup> Changdeuck Bae,<sup>c</sup> Hyangsook Lee,<sup>d,e</sup> Mirine Leem,<sup>e</sup> Hoijoon Kim,<sup>e</sup>  
Wonsik Ahn,<sup>e</sup> Jinbum Kim,<sup>a,b</sup> Eunha Lee,<sup>d</sup> Hyunjung Shin,<sup>\*c</sup> and Hyoungsub Kim<sup>\*e,f</sup>

<sup>a</sup> *Semiconductor R&D Center, Samsung Electronics, Hwaseong 18448, Republic of Korea*

<sup>b</sup> *Department of Semiconductor and Display Engineering, Sungkyunkwan University, Suwon 16419, Republic of Korea*

<sup>c</sup> *Department of Energy Science, Sungkyunkwan University, Suwon 16419, Republic of Korea*

<sup>d</sup> *Samsung Advanced Institute of Technology, Suwon 16678, Republic of Korea*

<sup>e</sup> *School of Advanced Materials Science and Engineering, Sungkyunkwan University, Suwon 16419, Republic of Korea*

<sup>f</sup> *SKKU Advanced Institute of Nanotechnology (SAINT), Sungkyunkwan University, Suwon 16419, Republic of Korea*

<sup>\*</sup> *E-mail: [hsubkim@skku.edu](mailto:hsubkim@skku.edu) (H. Kim) and [hshin@skku.edu](mailto:hshin@skku.edu) (H. Shin)*

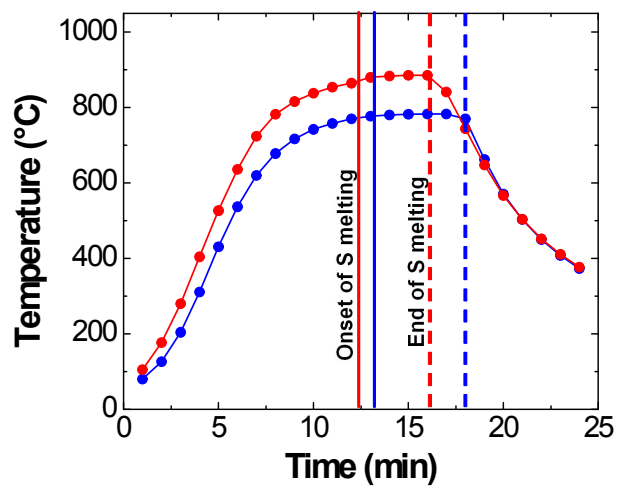

**Fig. S1** CVD temperature profiles for the 780 °C (blue) and 890 °C (red) experiments. The onset and end points for sulfur melting are indicated with solid and dashed lines, respectively.

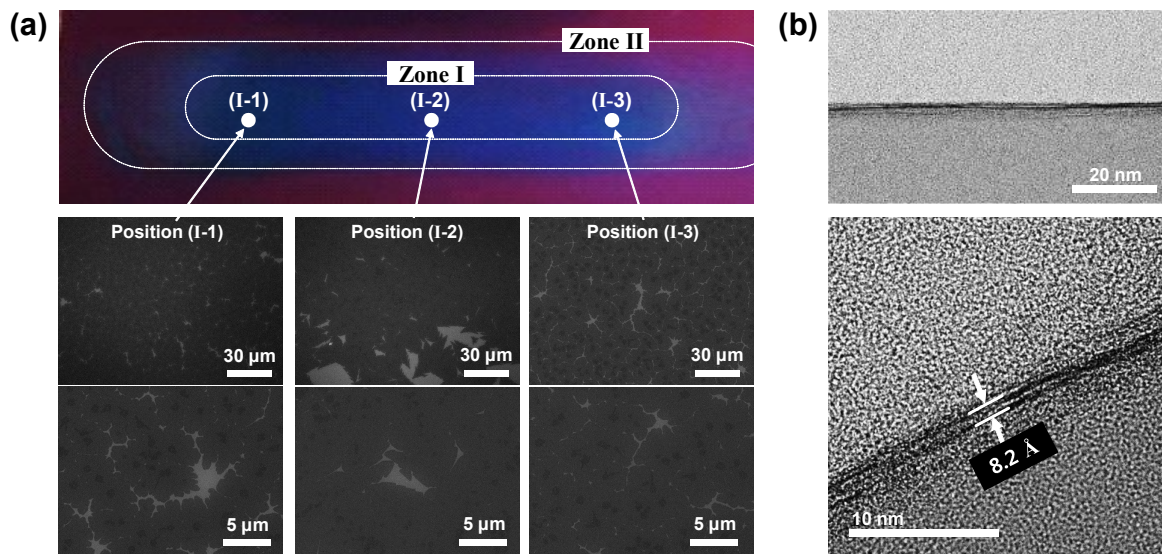

**Fig. S2** (a) SEM images of the coalesced MoS<sub>2</sub> films grown on different positions in Zone I. (b) TEM analysis results of a monolayer MoS<sub>2</sub> film obtained from position I-2 in Zone I.

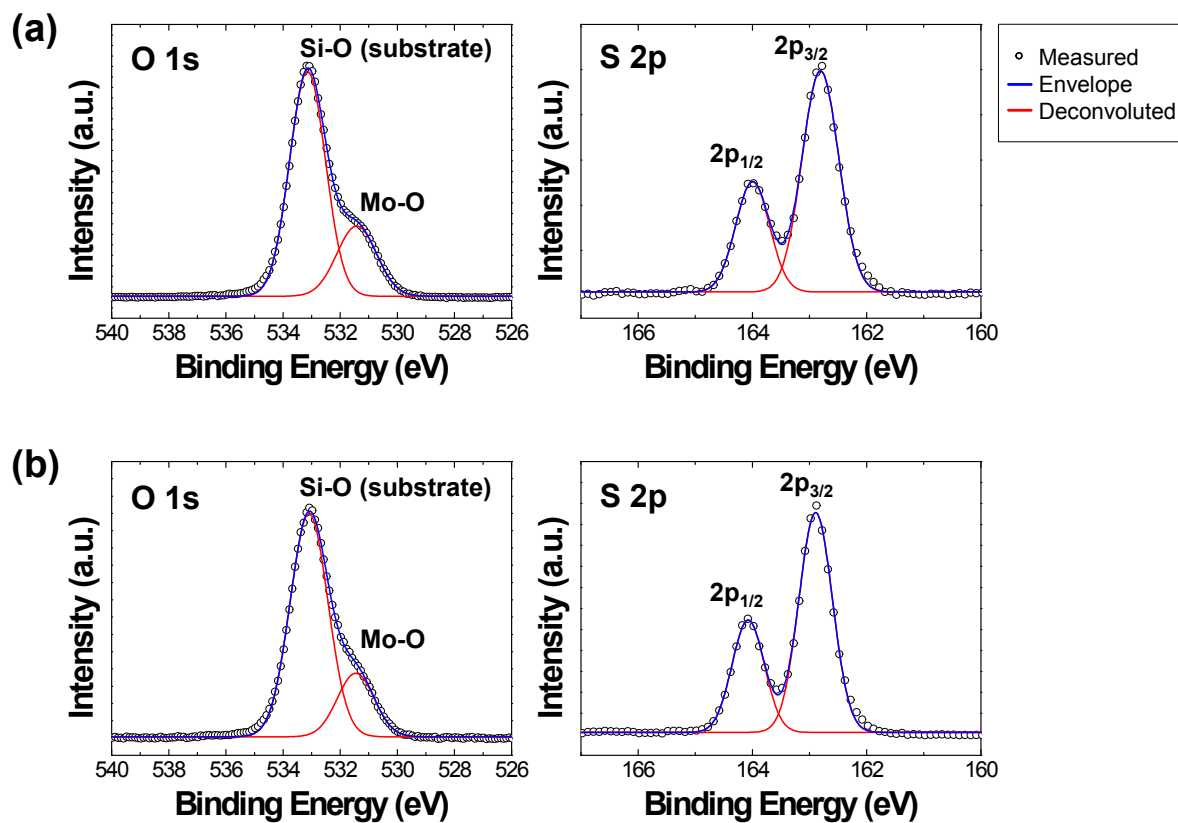

**Fig. S3** XPS spectra of O 1s and S 2p peaks measured from (a) center and (b) tail regions marked in Fig. 1(b).

**Table S1.** Peak information and quantification results of XPS.

| Position                                          | Peak                                     | Binding energy (eV) | FWHM (eV) | Area<br>(normalized) | Atomic % |
|---------------------------------------------------|------------------------------------------|---------------------|-----------|----------------------|----------|
| Confined<br>center<br><br>Mo : S<br>= 0.95 : 1.00 | Mo 3d <sub>5/2</sub> (Mo <sup>4+</sup> ) | 229.93              | 0.79      | 25.82                | 7.1      |
|                                                   | Mo 3d <sub>5/2</sub> (Mo <sup>5+</sup> ) | 232.46              | 1.6       | 11.54                | 3.2      |
|                                                   | Mo 3d <sub>5/2</sub> (Mo <sup>6+</sup> ) | 233.38              | 1.27      | 14.93                | 4.1      |
|                                                   | O 1s                                     | 533.11              | 1.62      | 256.73               | 70.5     |
|                                                   | S 2p                                     | 162.81              | 0.74      | 55                   | 15.1     |
| Confined<br>tail<br><br>Mo : S<br>= 0.63 : 1.00   | Mo 3d <sub>5/2</sub> (Mo <sup>4+</sup> ) | 230.07              | 0.69      | 47.63                | 14.7     |
|                                                   | Mo 3d <sub>5/2</sub> (Mo <sup>5+</sup> ) | 232.75              | 1.81      | 11.51                | 3.6      |
|                                                   | Mo 3d <sub>5/2</sub> (Mo <sup>6+</sup> ) | 233.75              | 1.1       | 5.52                 | 1.7      |
|                                                   | O 1s                                     | 533.06              | 1.76      | 156                  | 48.2     |
|                                                   | S 2p                                     | 162.9               | 0.67      | 102.98               | 31.8     |

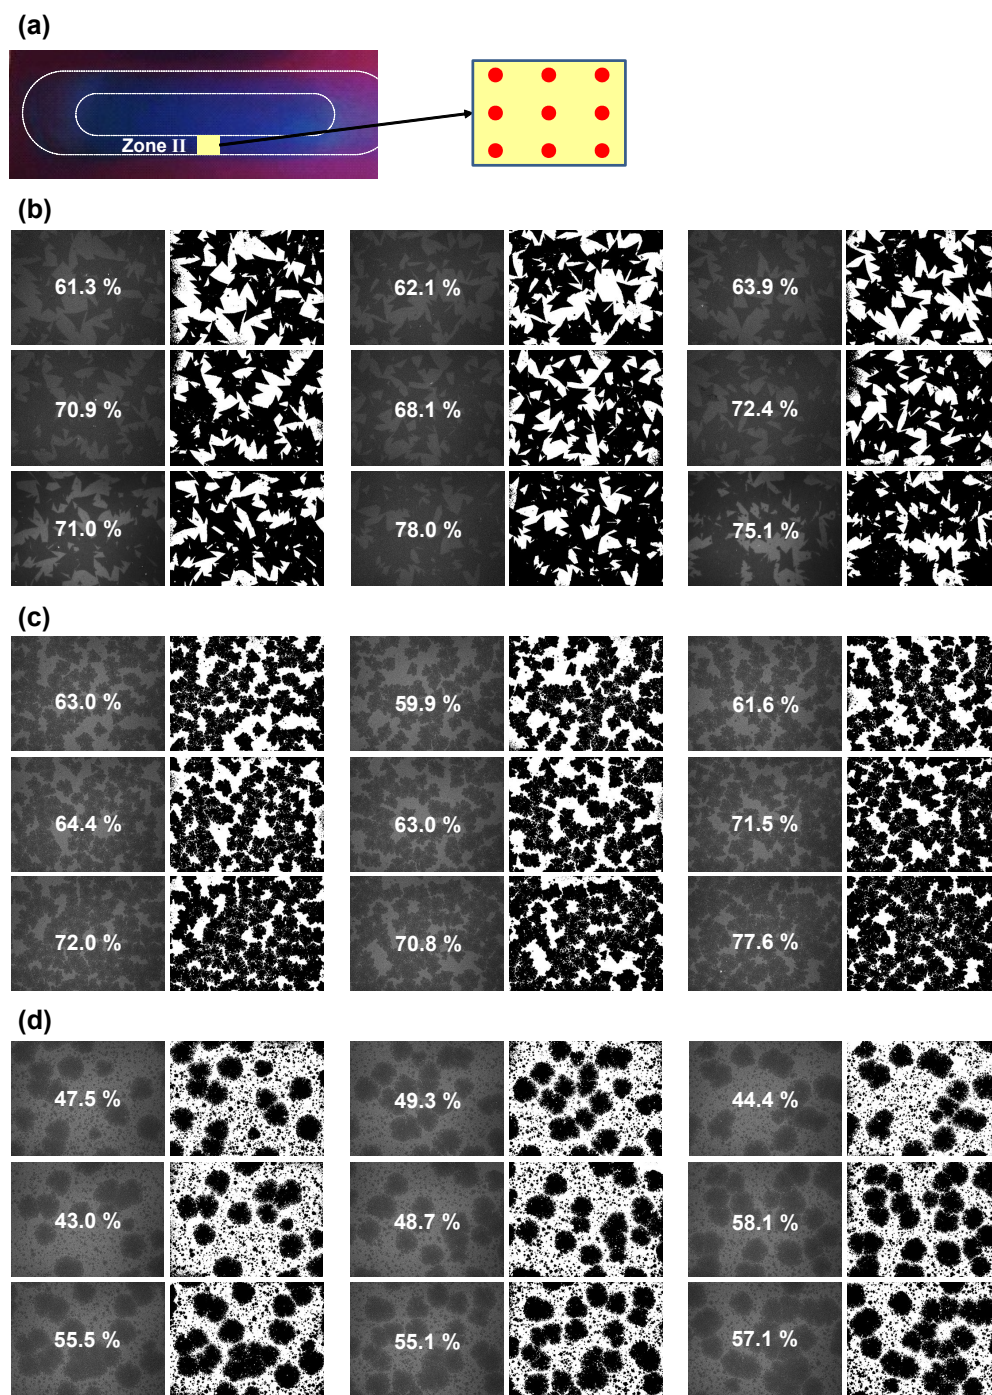

**Fig. S4** (a) Diagram showing the sample area (yellow box) used for the LSV measurement and also the nine positions (red dots) taken for SEM imaging. (b)–(d) SEM images and the corresponding converted binary contrast images of (b) T-MoS<sub>2</sub>, (c) S-MoS<sub>2</sub>, and (d) D-MoS<sub>2</sub> samples. All the SEM images are taken after transferring the MoS<sub>2</sub> flakes on the Au/Si substrates and the estimated projected areal portions are presented in each SEM image.

**Table S2.** Estimated dimensions and corresponding HER performance of T-, S-, and D-MoS<sub>2</sub>.

| Flake              | Flake area<br>exposed to LSV<br>( $\mu\text{m}^2$ ) | Flake edge length<br>exposed to LSV<br>( $\mu\text{m}$ ) | Current density<br>at -4.0 V<br>(mA/cm <sup>2</sup> ) | HER in the unit<br>area*<br>(mA/cm <sup>2</sup> ) | HER in the unit<br>length**<br>(mA/cm <sup>2</sup> ) |
|--------------------|-----------------------------------------------------|----------------------------------------------------------|-------------------------------------------------------|---------------------------------------------------|------------------------------------------------------|
| T-MoS <sub>2</sub> | 41520 $\pm$ 3480                                    | 11061 $\pm$ 409                                          | 15.8                                                  | 3.8 $\times$ 10 <sup>-4</sup>                     | 1.4 $\times$ 10 <sup>-3</sup>                        |
| S-MoS <sub>2</sub> | 40260 $\pm$ 3600                                    | 20683 $\pm$ 770                                          | 25.2                                                  | 6.3 $\times$ 10 <sup>-4</sup>                     | 1.2 $\times$ 10 <sup>-3</sup>                        |
| D-MoS <sub>2</sub> | 30600 $\pm$ 3360                                    | 29611 $\pm$ 1065                                         | 58.5                                                  | 1.9 $\times$ 10 <sup>-3</sup>                     | 2.0 $\times$ 10 <sup>-3</sup>                        |

\* HER in the unit area was calculated by dividing the current density with the flake area.

\*\* HER in the unit length was calculated by dividing the current density with the flake edge length. The similar values for T- and S-MoS<sub>2</sub> suggested their similar crystalline edge qualities. In the case of D-MoS<sub>2</sub>, the value was believed to be overestimated because the additional edge length from the overlapping crystals could not be determined from the binary contrast images (see Fig. S4d).

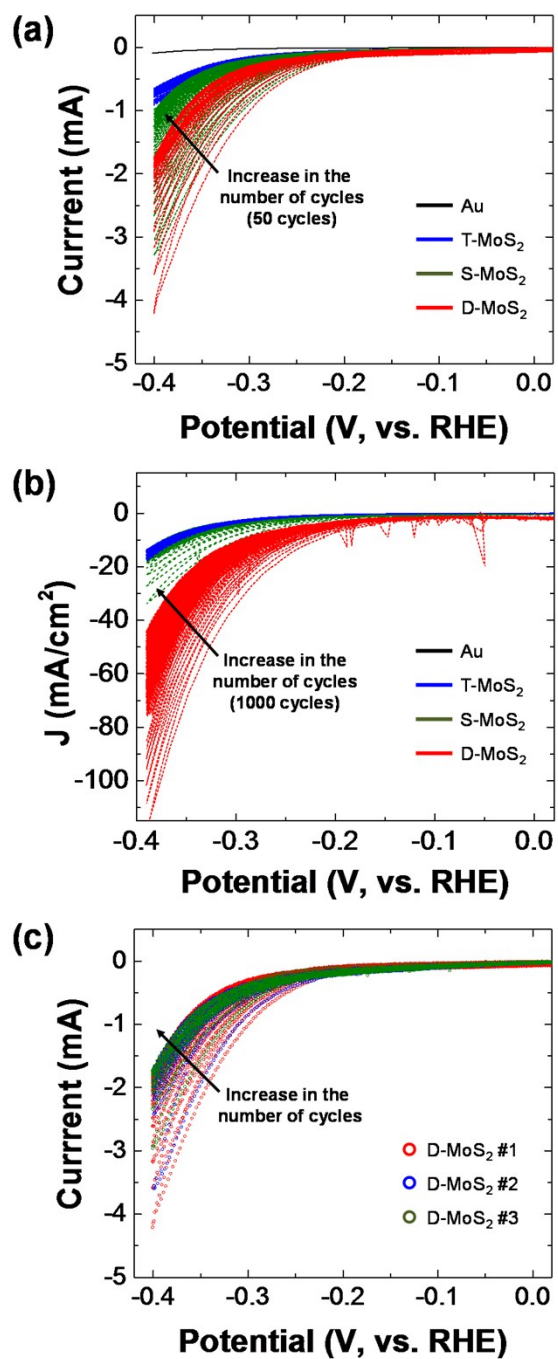

**Fig. S5** (a) LSV measurements for 50 cycles and (b) HER polarization curves during 1000 measurement cycles for the T-, S-, and D-MoS<sub>2</sub> samples. (c) LSV measurements of the D-MoS<sub>2</sub> obtained from three different batches.
